# Supplementary material
Source: publisher figshare collection journal article supplement (https://springernature.figshare.com/ndownloader/files/10767952)
Supplement: Supplementary file [file 10767952]

**Supplementary Figures**

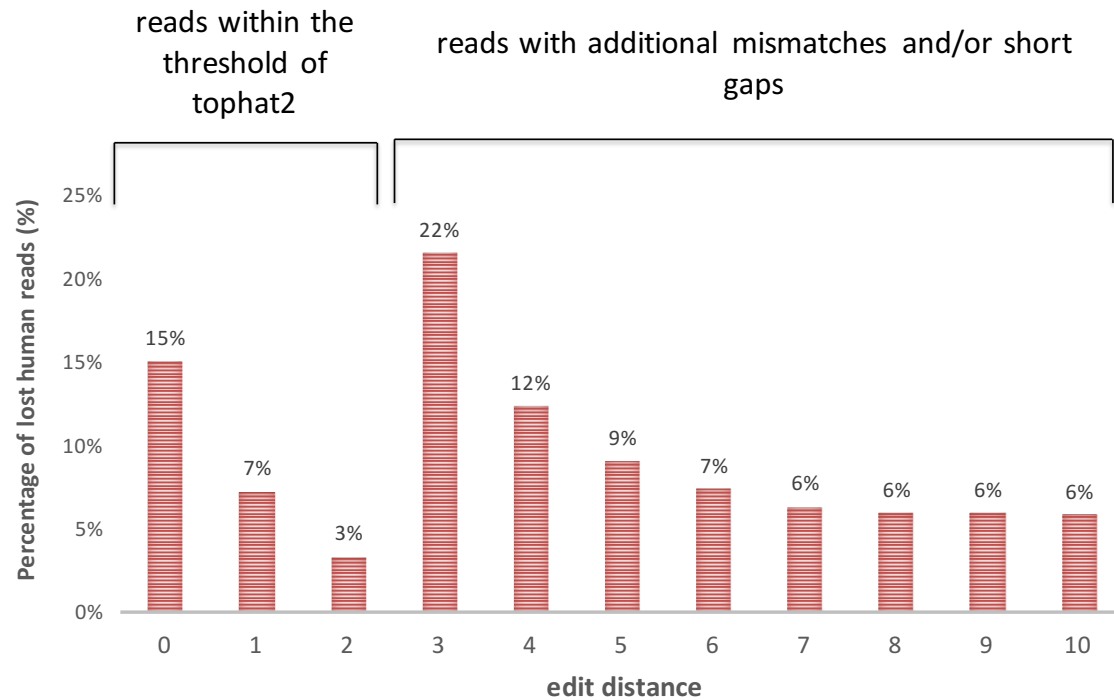

**Supplemental Figure S1. Edit distance of lost human reads.**

Unmapped reads were remapped to the human references using Megablast. Edit distance was calculated as the minimum number of operations required to transform a read sequence into the corresponding reference subsequence. Reads are grouped by edit distance with the transcriptome or the genome reference. The percentages are the averages across 10,641 samples.

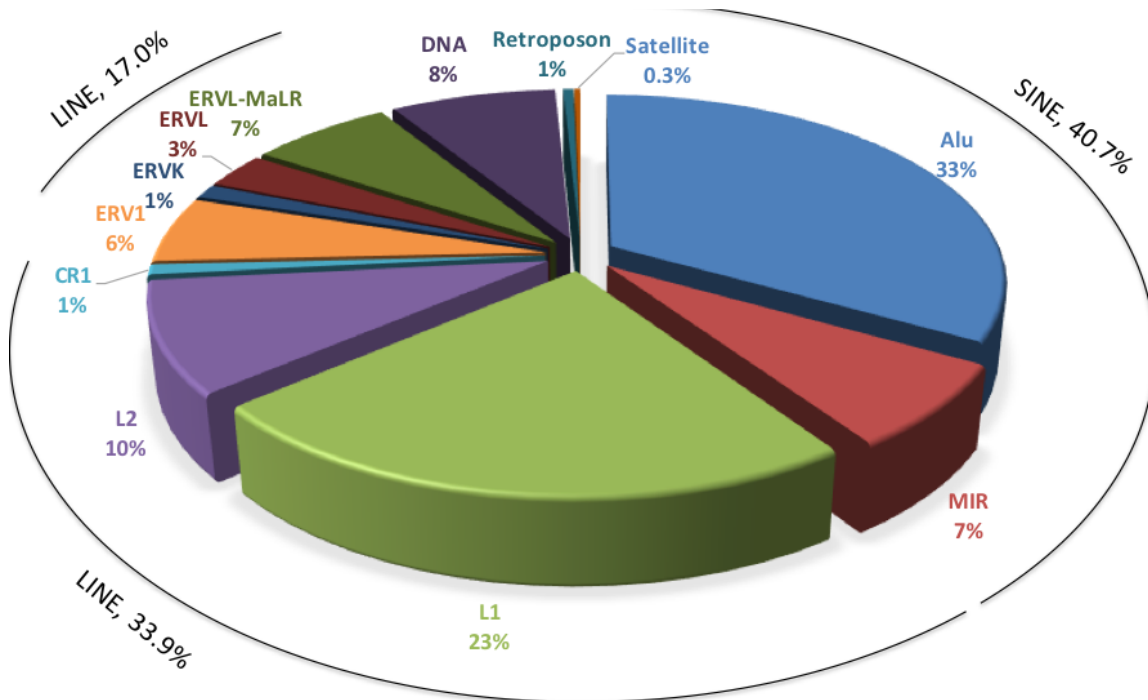

On average 7% of RNA-Seq reads are categorized as repeats

**Supplemental Figure S2. Profile of repeat elements based on repeat sequences inferred from mapped and unmapped reads (lost repeat reads).**

ROP identifies and categorizes repetitive sequences among the mapped and unmapped reads. Mapped reads were categorized based on the overlap with the repeat instances prepared from RepeatMasker annotation (RepeatMasker v3.3, Repeat Library 20120124). Lost repeat reads are unmapped RNA-Seq reads aligned onto the reference repeat sequences (prepared from Repbase v20.07). The percentages are the averages across 10,641 samples.

## GTEx DNA repeats

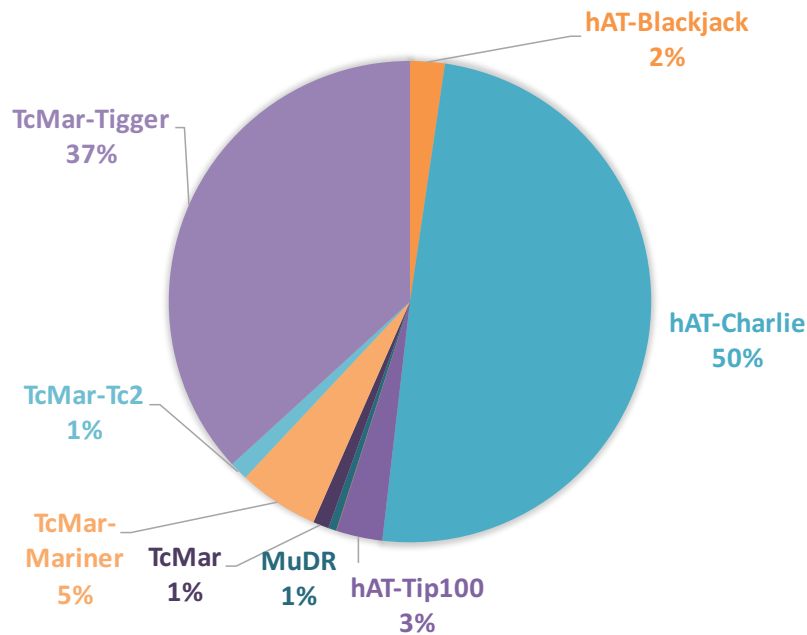

\*Percentages are calculated as a fraction from the reads matching DNA repeats

26

27 **Supplemental Figure S3. Profile of DNA repeats based on repeat sequences inferred**  
 28 **from mapped and unmapped reads (lost repeat reads).**

29 ROP identifies and categorizes DNA repetitive sequences among the mapped and  
 30 unmapped reads. Mapped reads were categorized based on the overlap with the repeat  
 31 instances prepared from RepeatMasker annotation (RepeatMasker v3.3, Repeat Library  
 32 20120124). Lost repeat reads are unmapped RNA-Seq reads aligned onto the reference  
 33 repeat sequences (prepared from Repbase v20.07). The percentages are the averages  
 34 across 10,641 samples.

35

## SINE–VNTR–*Alu* (SVA)

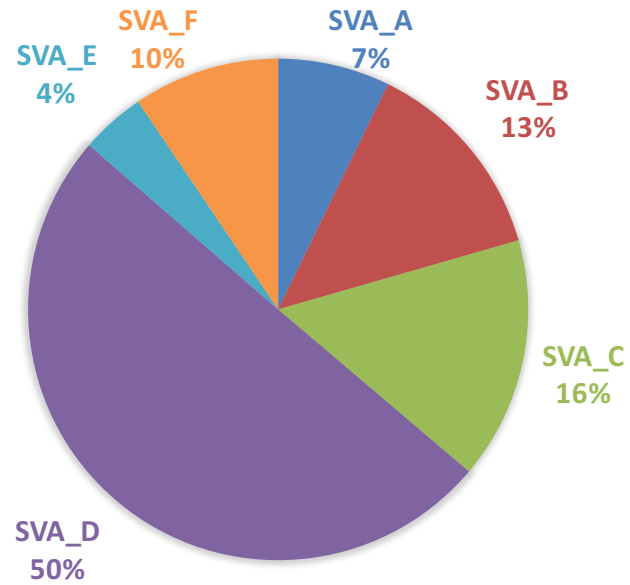

\*Percentages are calculated as a fraction from the reads matching SVA Retroposons

36

37

**Supplemental Figure S4. Profile of SVA retrotransposons based on repeat sequences inferred from mapped and unmapped reads (lost repeat reads).** ROP identifies and categorizes SVA retrotransposons sequences among the mapped and unmapped reads. Mapped reads were categorized based on the overlap with the repeat instances prepared from RepeatMasker annotation (Repeatmasker v3.3, Repeat Library 20120124). Lost repeat reads are unmapped RNA-Seq reads aligned onto the reference repeat sequences (prepared from Repbase v20.07). The percentages are the averages across 10,641 samples.

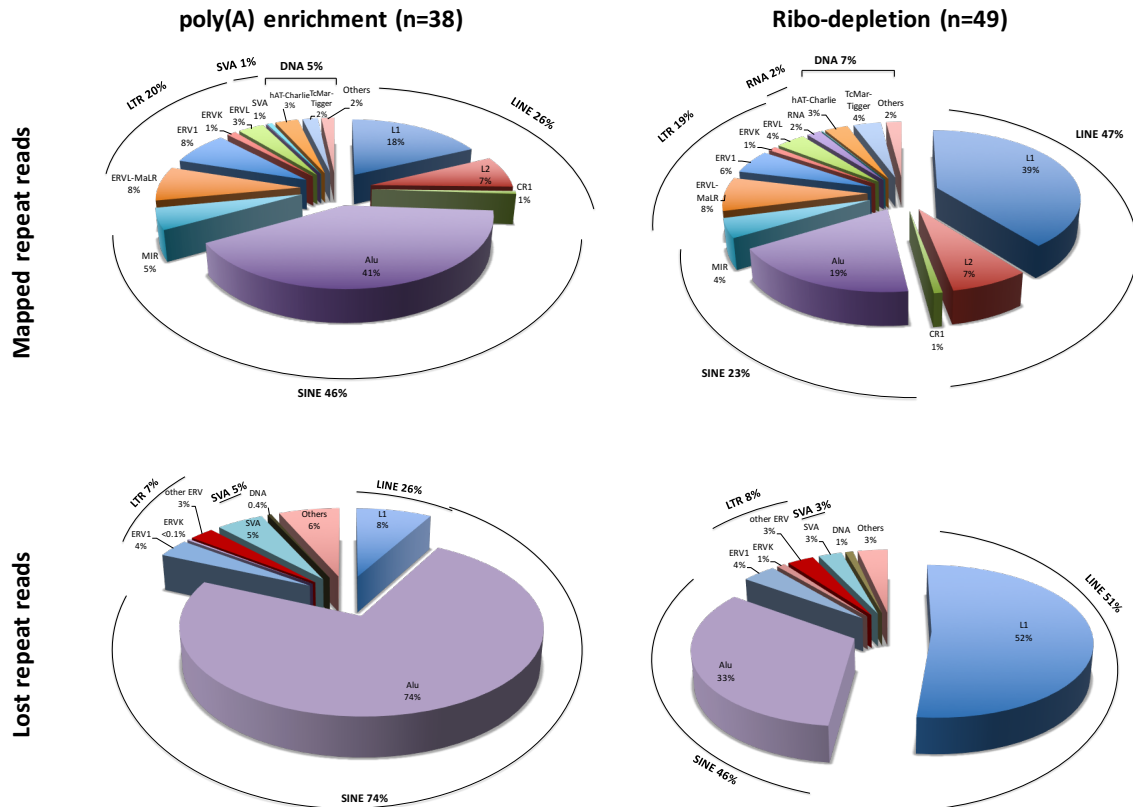

**Supplemental Figure S5.** Profile of repeat elements across poly(A) enrichment and ribo-depletion libraries. ROP identifies and categorizes repetitive sequences among the mapped and unmapped reads. RNA-Seq samples were prepared by poly(A) enrichment protocol (n=38) and ribo-depletion protocol (n=49). Mapped reads were categorized based on the overlap with the repeat instances prepared from RepeatMasker annotation (RepeatMasker v3.3, Repeat Library 20120124). Lost repeat reads are unmapped RNA-Seq reads aligned onto the reference repeat sequences (prepared from Repbase v20.07).

57

### Average Number of SVA-F reads across Tissue

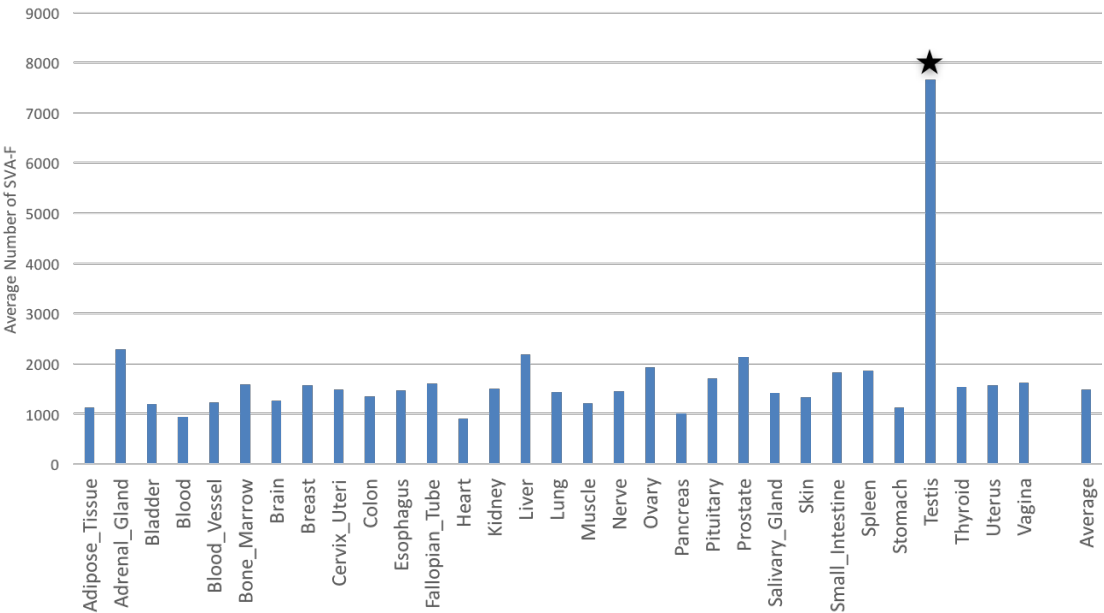

58

59

60 **Supplemental Figure S6.** Average number of SVA-F reads across GTEx tissues. ROP  
61 identifies and categorizes SVA retrotransposons sequences among the mapped and  
62 unmapped reads. Mapped reads were categorized based on the overlap with the repeat  
63 instances prepared from RepeatMasker annotation (RepeatMasker v3.3, Repeat Library  
64 20120124). Lost repeat reads are unmapped RNA-Seq reads aligned onto the reference  
65 repeat sequences (prepared from Repbase v20.07). Among the GTEx tissues, *testis*  
66 showed significantly higher expression of SVA F retrotransposons compared to other  
67 tissues ( $p = 2.46 \times 10^{-33}$ ).

## Alu and L1 co-expression in Individual Tissues

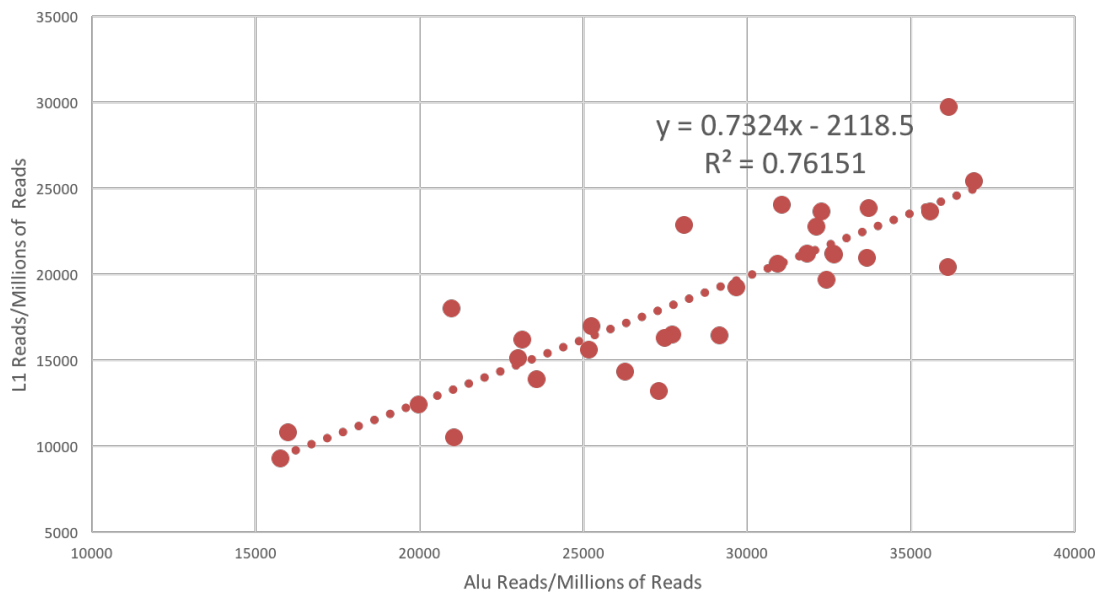

68

69

70 **Supplemental Figure S7.** Co-expression of Alu and L1 elements across GTEx tissues. ROP  
71 identifies and categorizes repetitive sequences among the mapped and unmapped reads.  
72 Mapped reads were categorized based on the overlap with the repeat instances prepared  
73 from RepeatMasker annotation (RepeatMasker v3.3, Repeat Library 20120124). Lost  
74 repeat reads are unmapped RNA-Seq reads aligned onto the reference repeat sequences  
75 (prepared from Repbase v20.07).



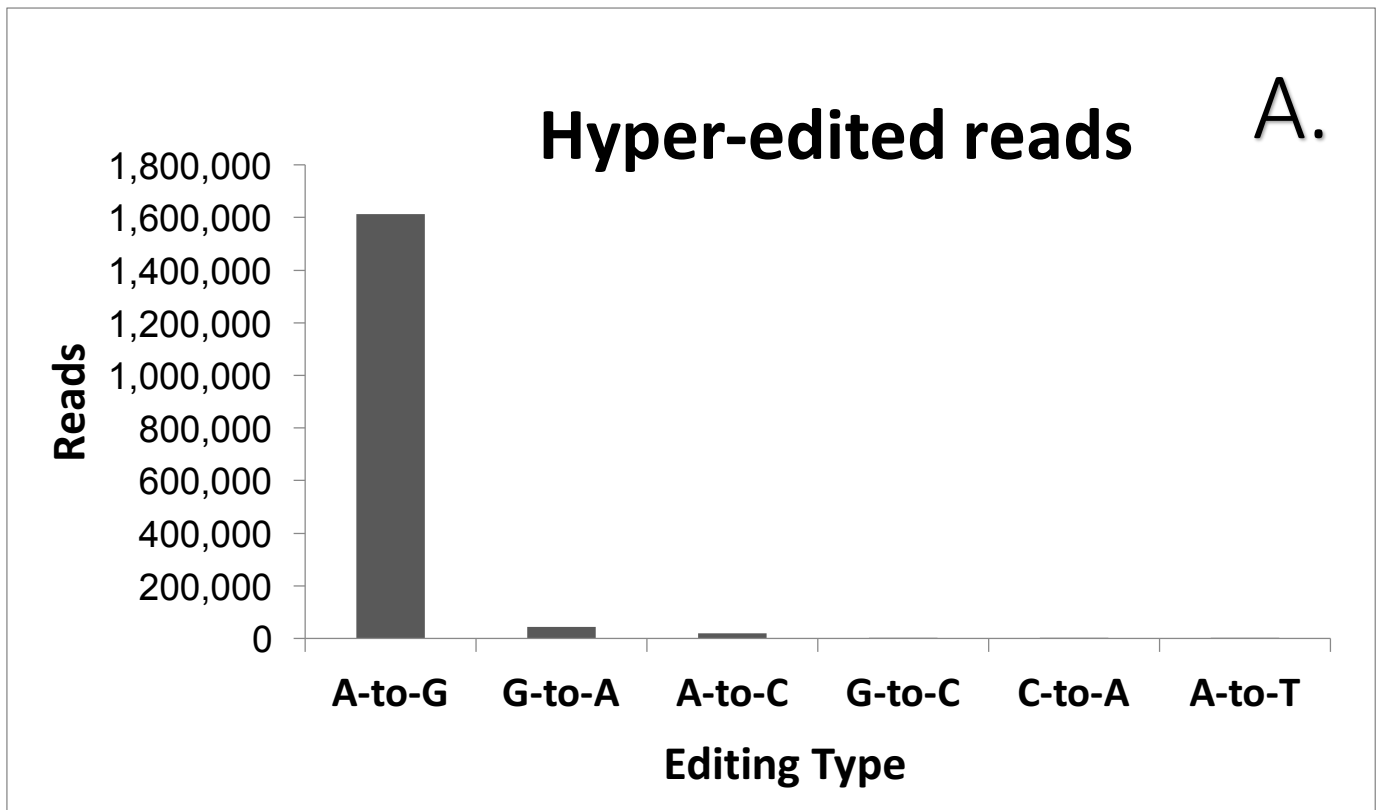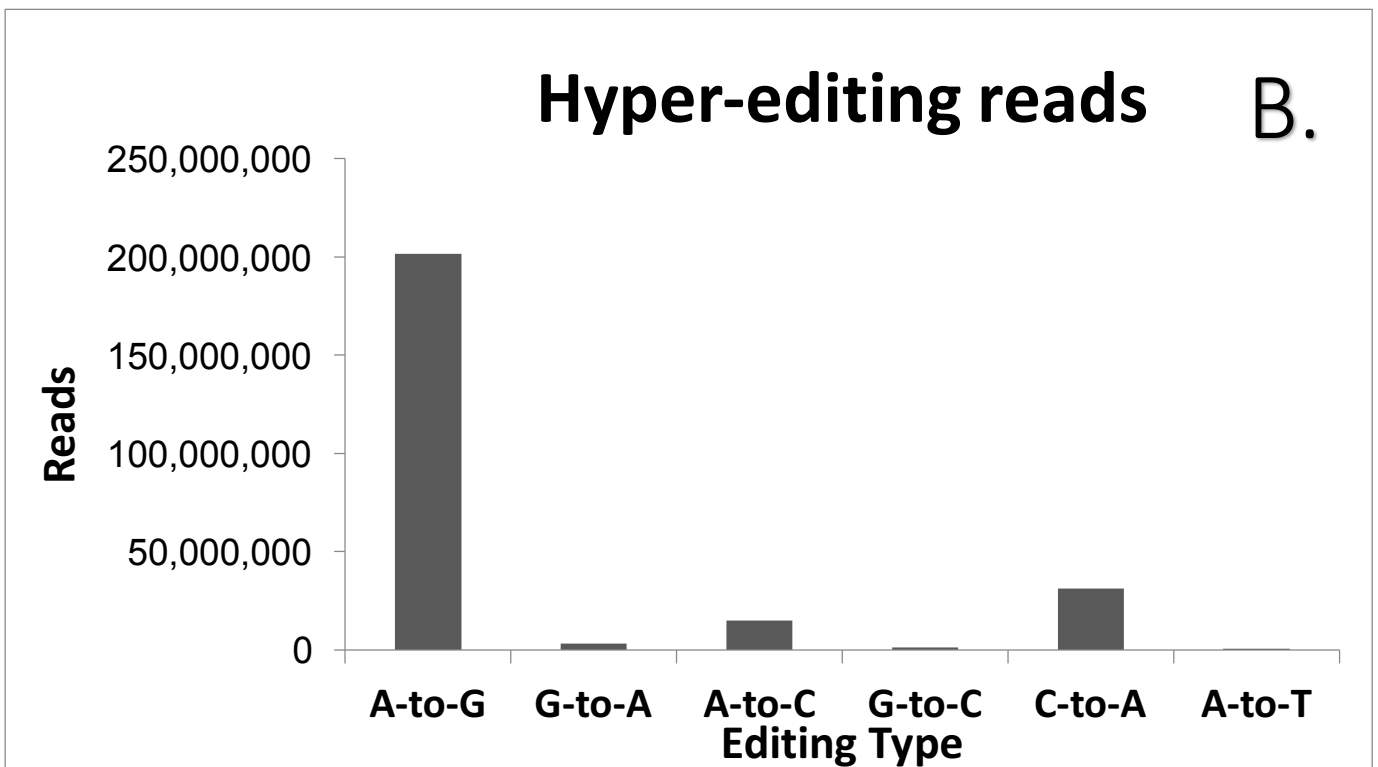

**Supplemental Figure S8. Distribution of hyper-edited reads.**

**A.** Hyper-editing identified in the in-house data. Results showed that 96% of the reads were A-to-G, indicating a high level of specificity for the hyper-editing screen. The 1,613,213 detected A-to-G reads contain 10,666,458 editing events (3,157,685 unique editing-sites). **B.** Hyper-editing identified in the GTEx RNA-Seq data. Results showed that 80% of the reads were A-to-G, indicating a high level of specificity for the hyper-editing screen. The 201,676,069 detected A-to-G reads contain 1,130,591,911 editing events (690,386,562 unique editing-sites).

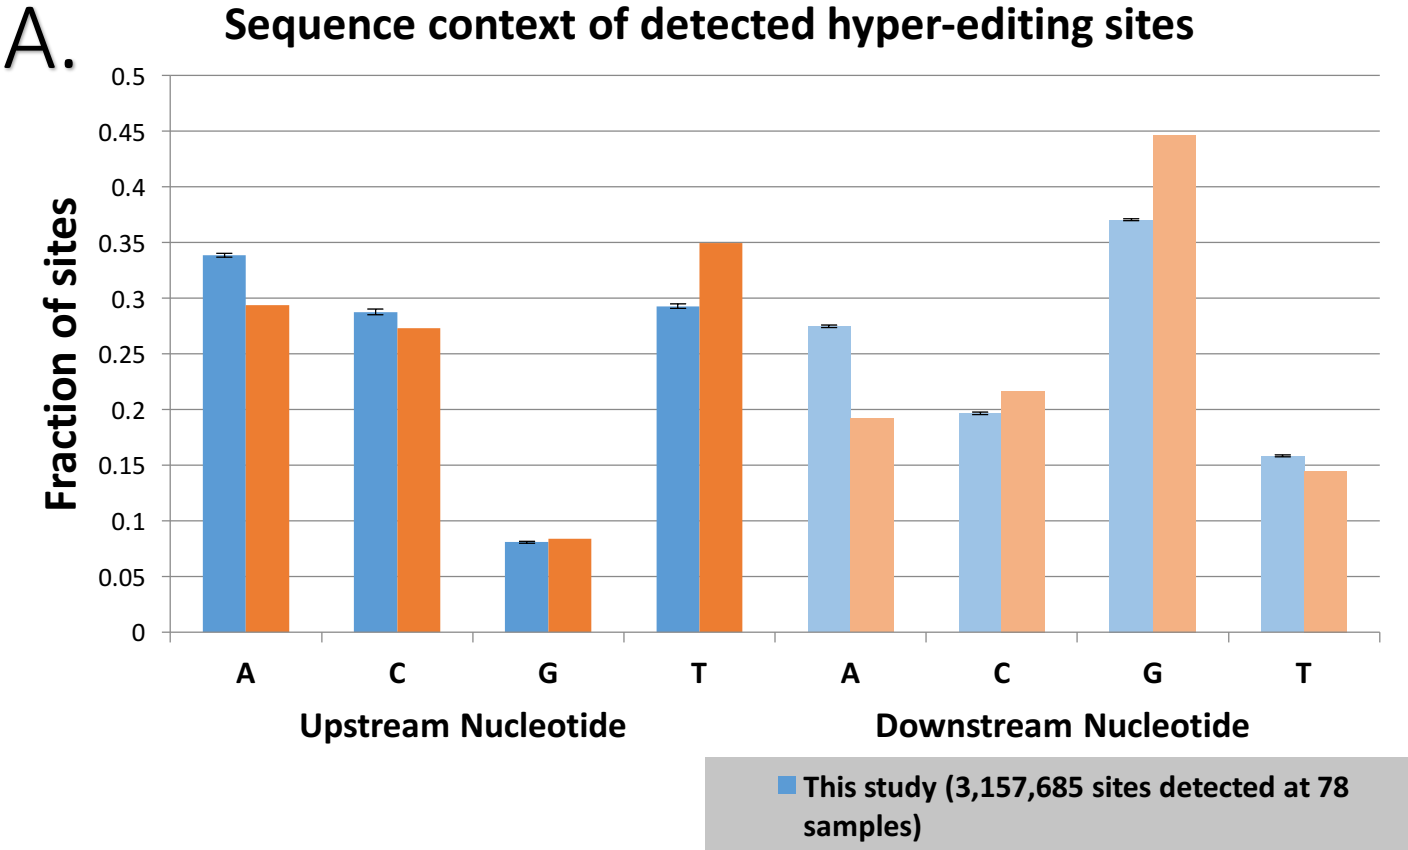

87

B.

88.

89

90

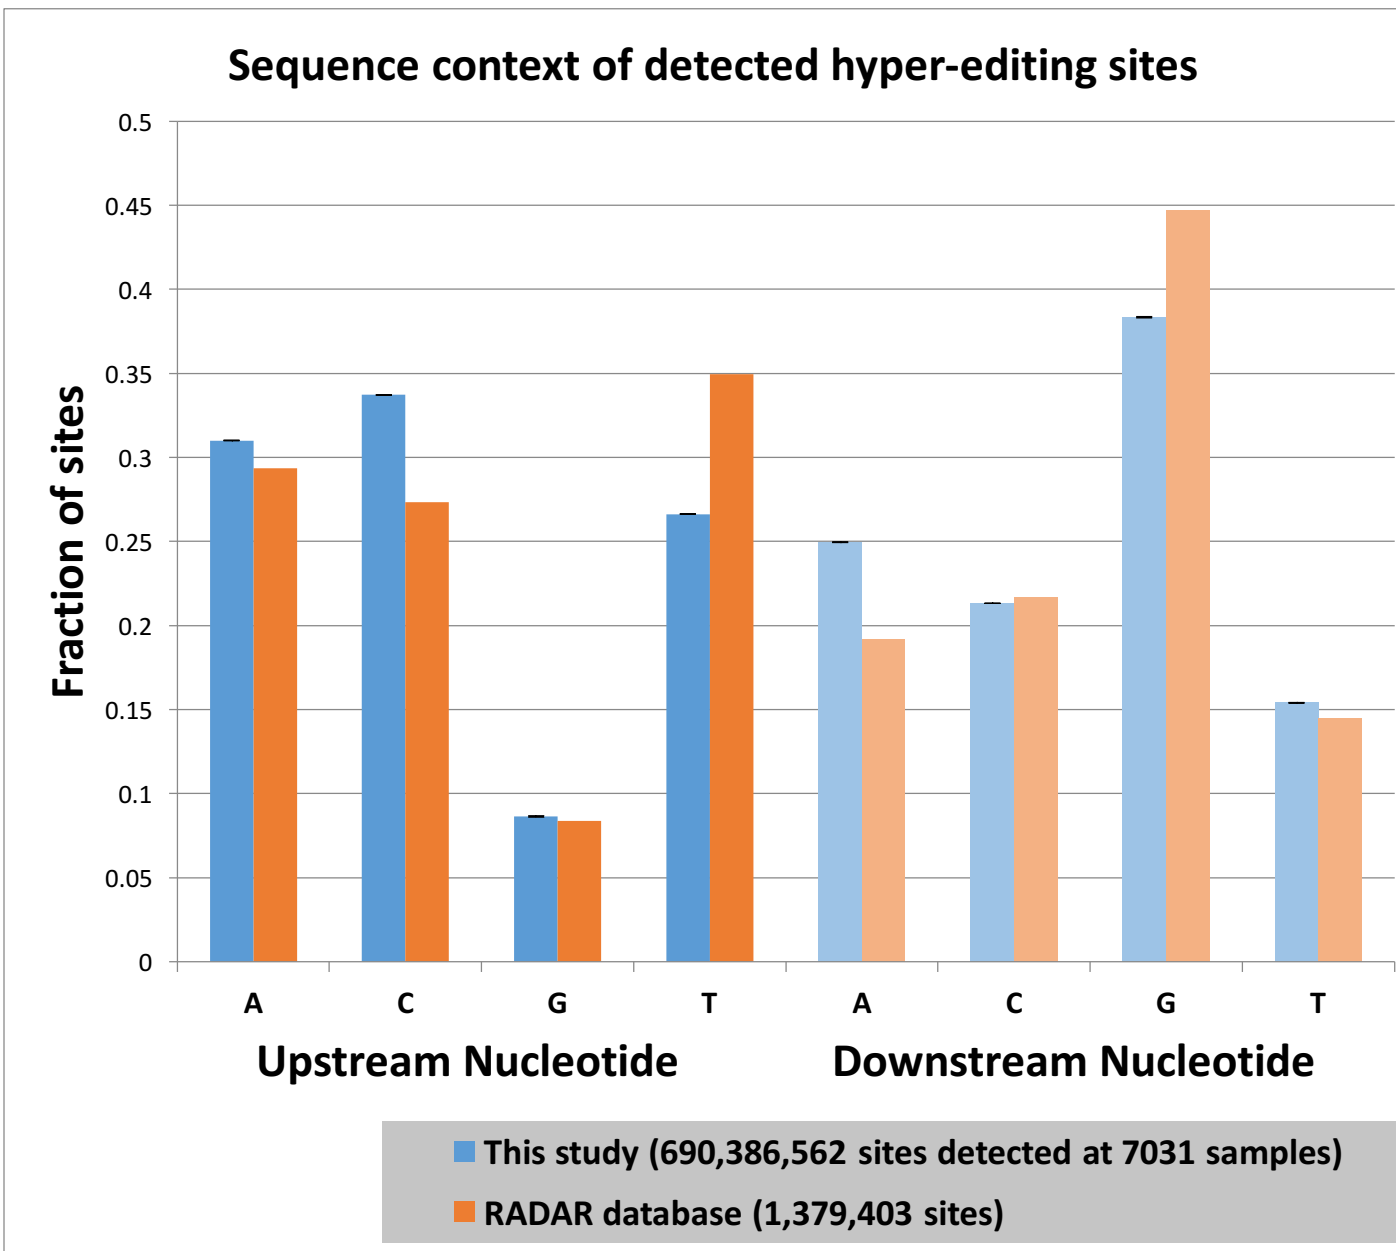

**Supplemental Figure S9. The sequence context of the Figure S8. The sequence context of the detected hyper-edited A-to-G sites.**

The sequence near the detected hyper-editing sites is depleted of Gs upstream and enriched with Gs downstream, in agreement with previously known data about the ADAR motif. The bars correspond to the fraction of editing sites with each type of nucleotide one base upstream and downstream of the site. Results are shown for sites detected in-house RNA-Seq data (A) and GTEx RNA-Seq data (B) using the hyper-editing pipeline and human editing-sites from the RADAR database.

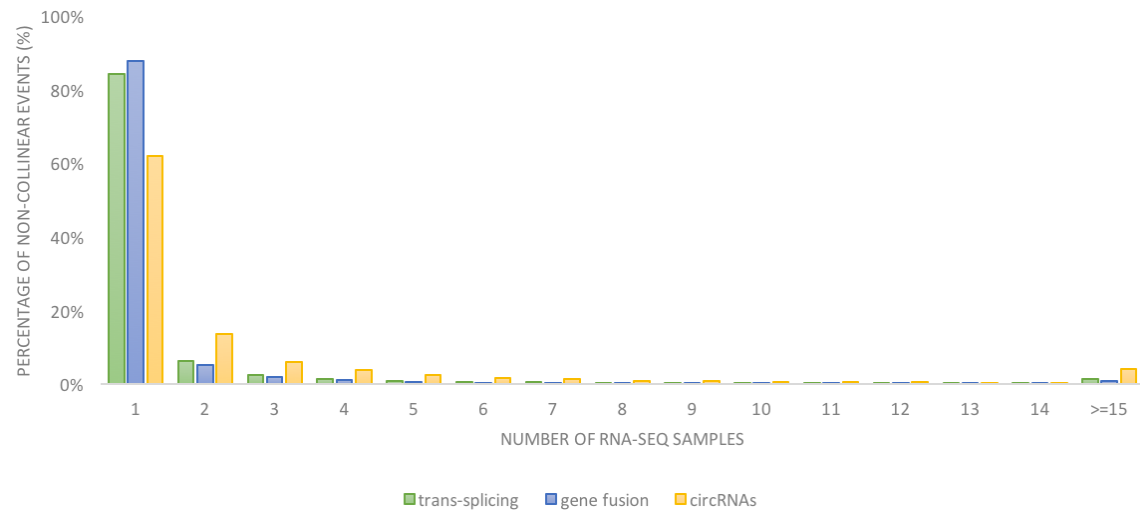

102

103 **Supplemental Figure S10. Distribution of non-co-linear (NCL) events across 10,641**  
 104 **samples. .**

105 Reads arising from trans-splicing, gene fusion and circRNA events are captured by a  
 106 TopHat-Fusion and CIRCexplorer2 tools. Trans-splicing events are identified from reads  
 107 that are spliced distantly on the same chromosome. Gene fusion events are identified  
 108 from reads spliced across different chromosomes. CircRNAs are identified from reads  
 109 spliced in a head-to-tail configuration.

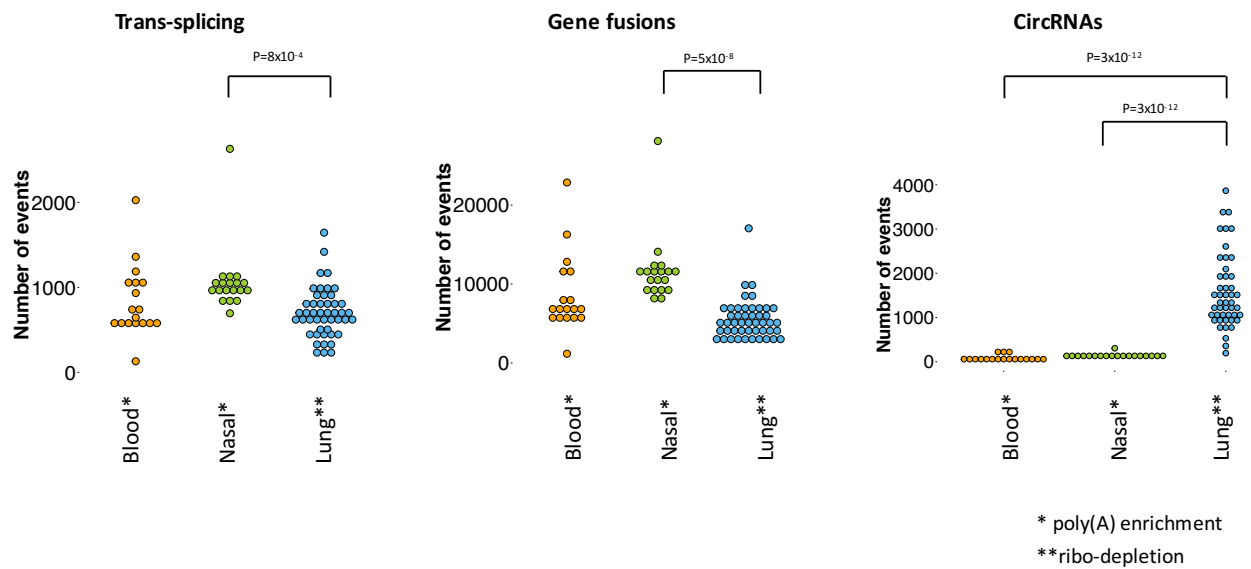

**Supplemental Figure S11. Number of NCL events across in-house tissues and library preparation protocols.**

NCL events per sample are detected by TopHat-Fusion and CIRCexplorer tools. Samples were prepared with poly(A) selection (whole blood and nasal epithelium) and ribo-depletion (lung epithelium) protocols. Trans-splicing events are identified from reads spliced distantly on the same chromosome. Gene fusion events are identified from reads spliced across different chromosomes.

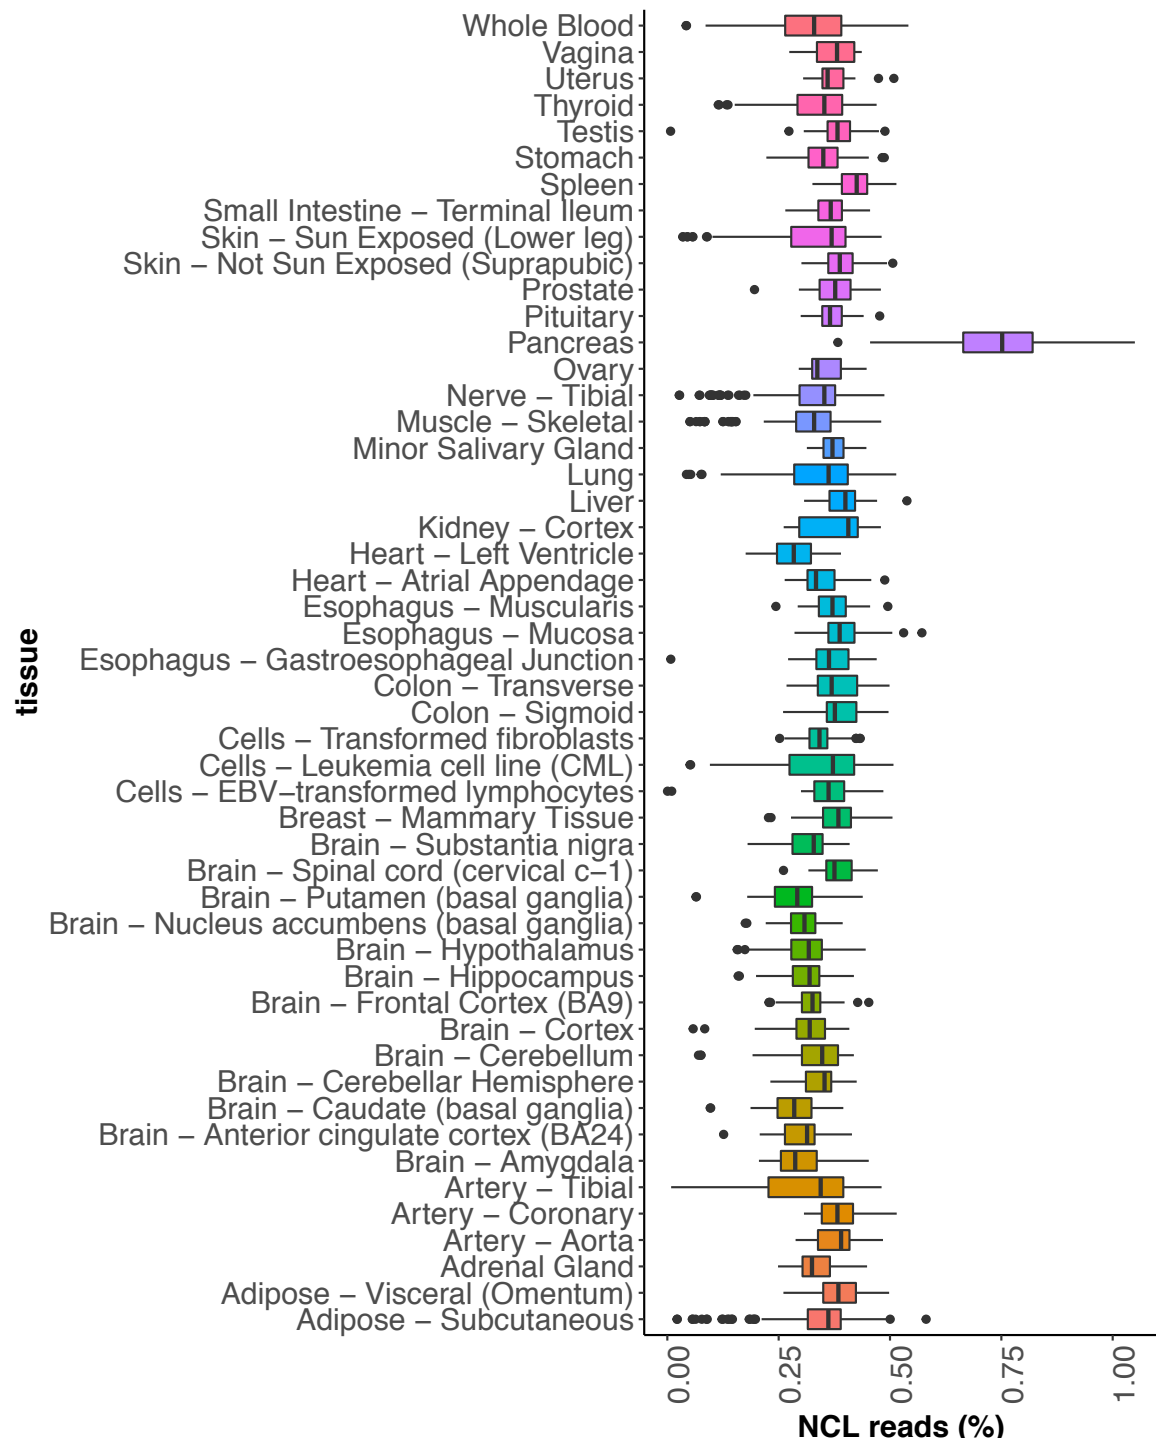

124

125

126

127

**Supplemental Figure S12. Percentage of NCL reads across GTEx tissues (n=54).**

Percentages are calculated from the total number of reads. Reads arising from trans-splicing, gene fusion and circRNA events are captured by a TopHat-Fusion and CIRCexplorer2 tools and reported a NCL reads.

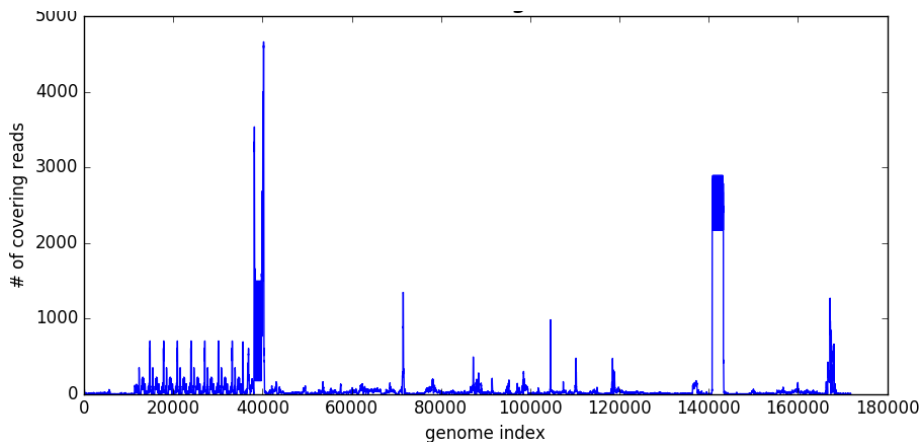

**Supplemental Figure S13.** An example of coverage plot of EBV virus. Viral reads were obtained by ROP protocol from GTEx RNA-Seq sample of EBV-transformed lymphoblastoid cell lines (LCLs).



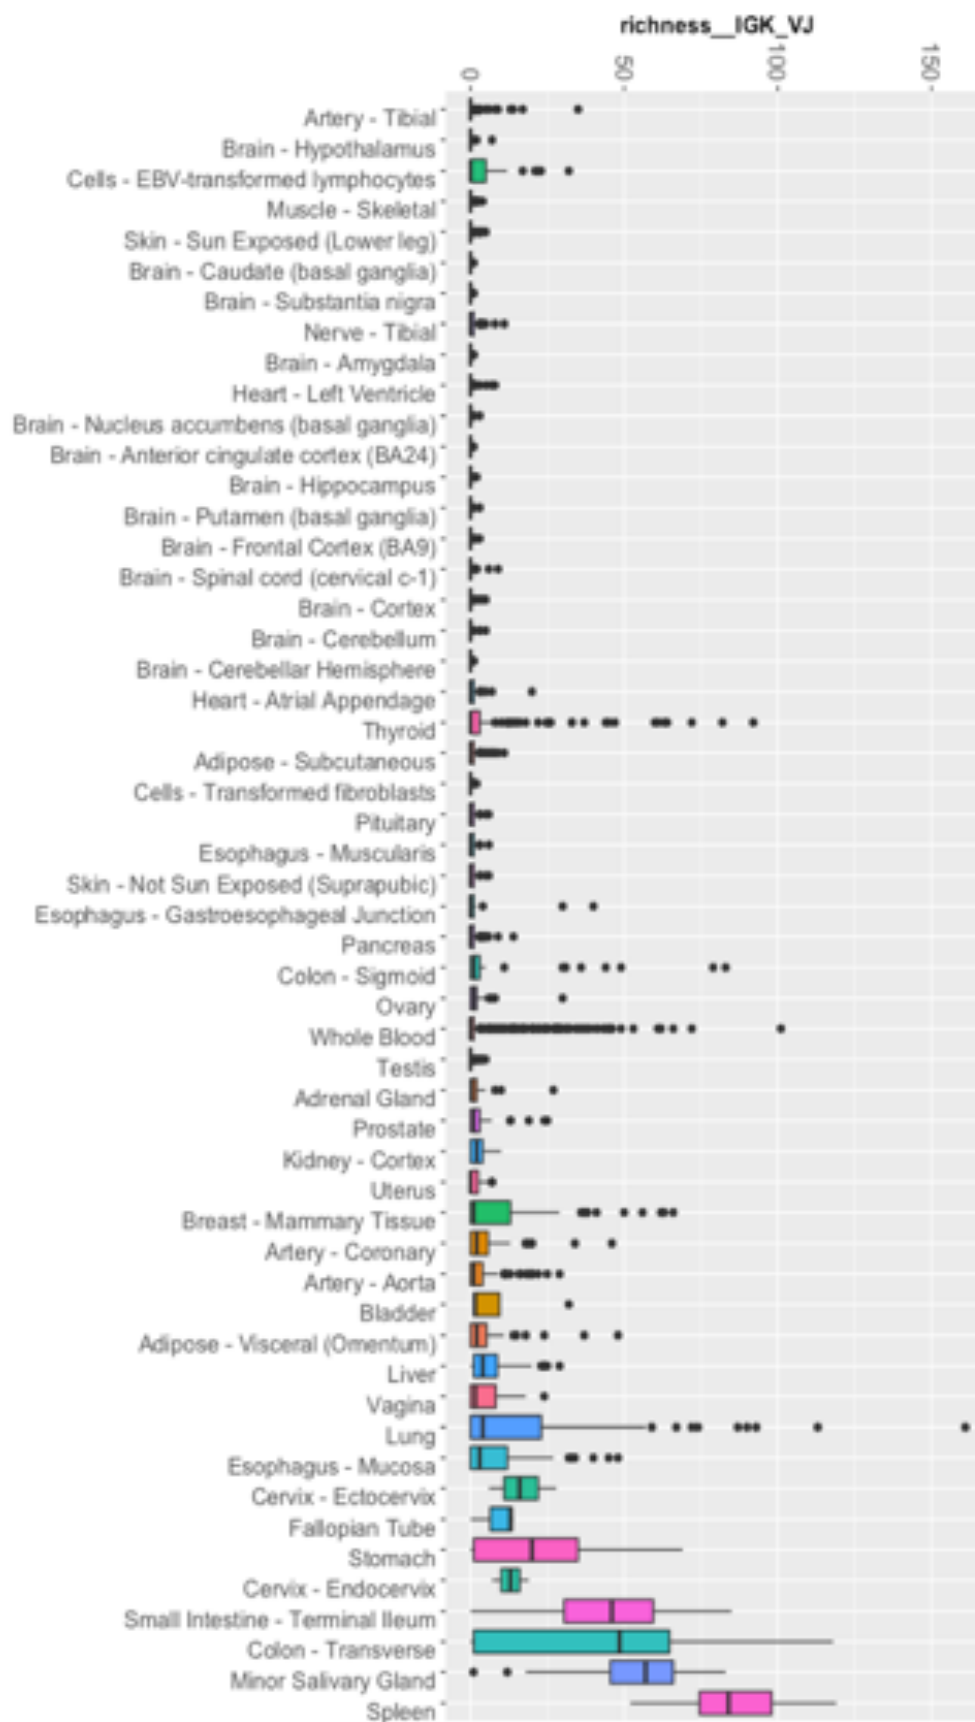

146    **Supplemental Figure S14. Number of VJ recombinations across GTEx human tissues for**  
147    **IGK chain.**

148

149

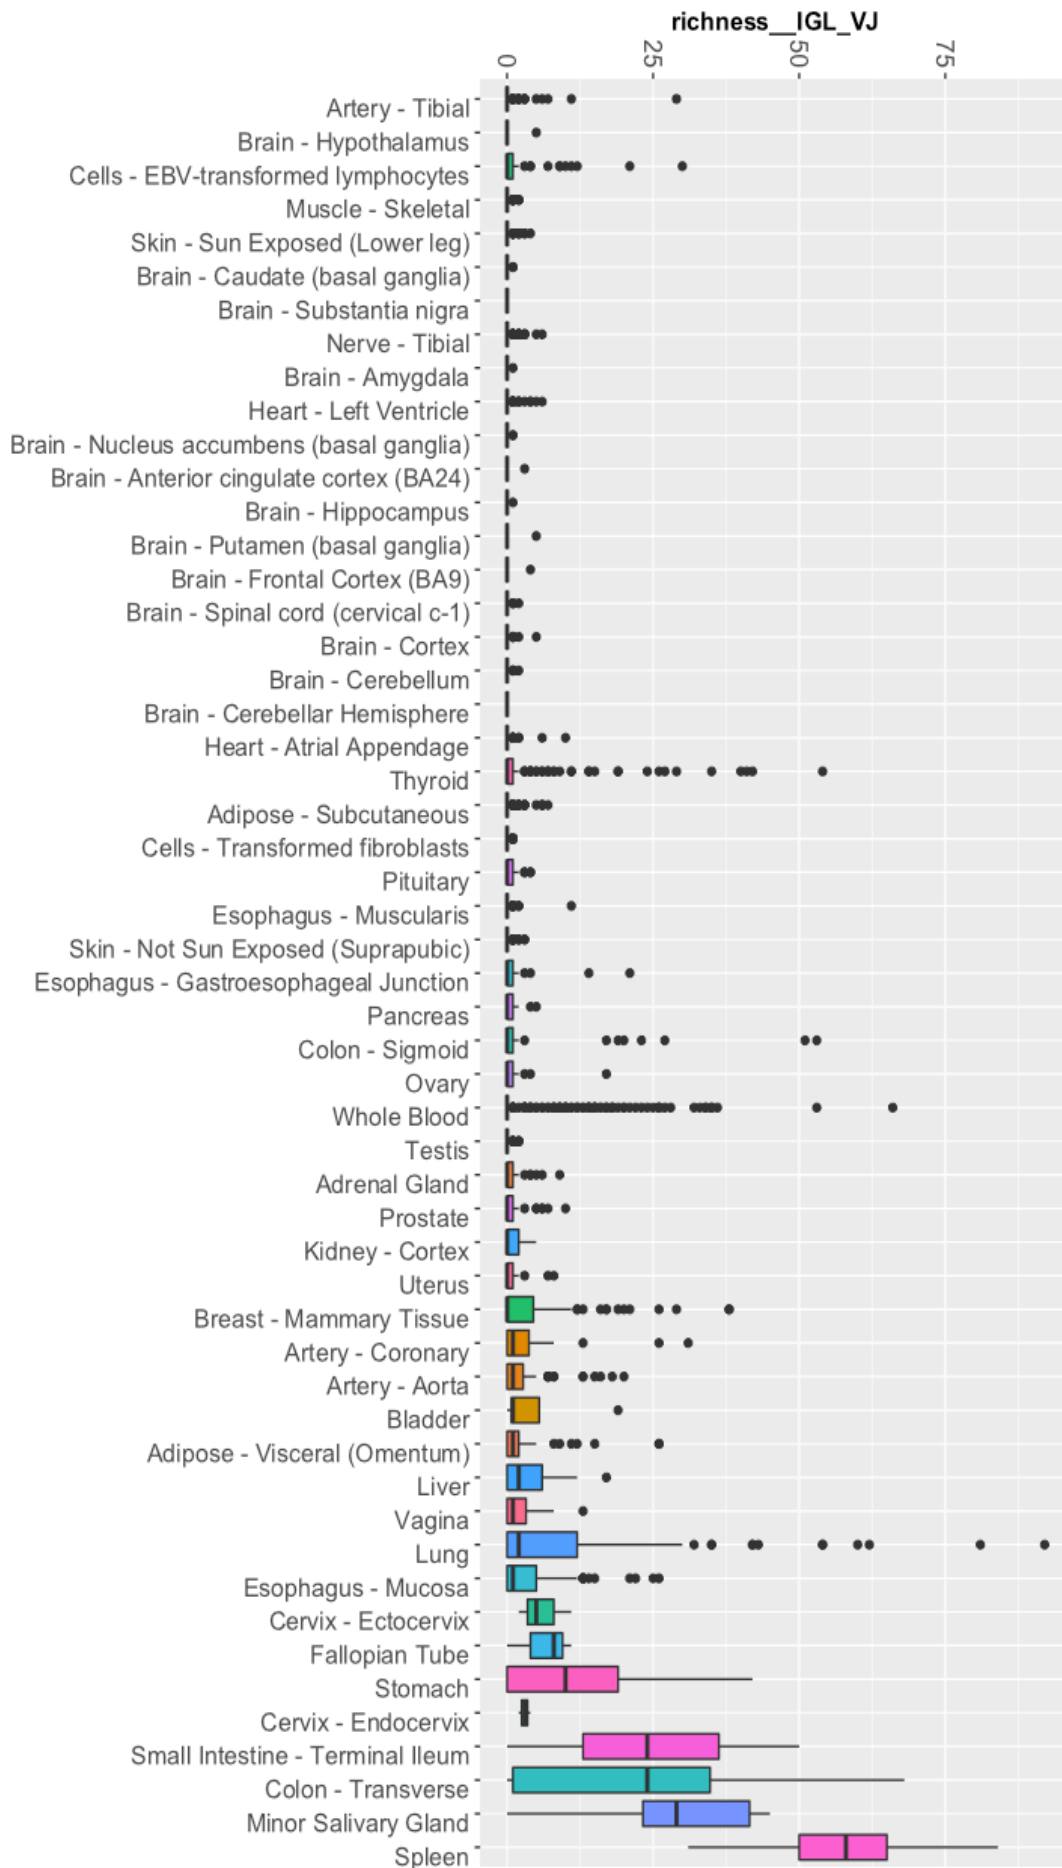

**Supplemental Figure S15. Number of VJ recombinations across GTEx human tissues for IGL chain.**

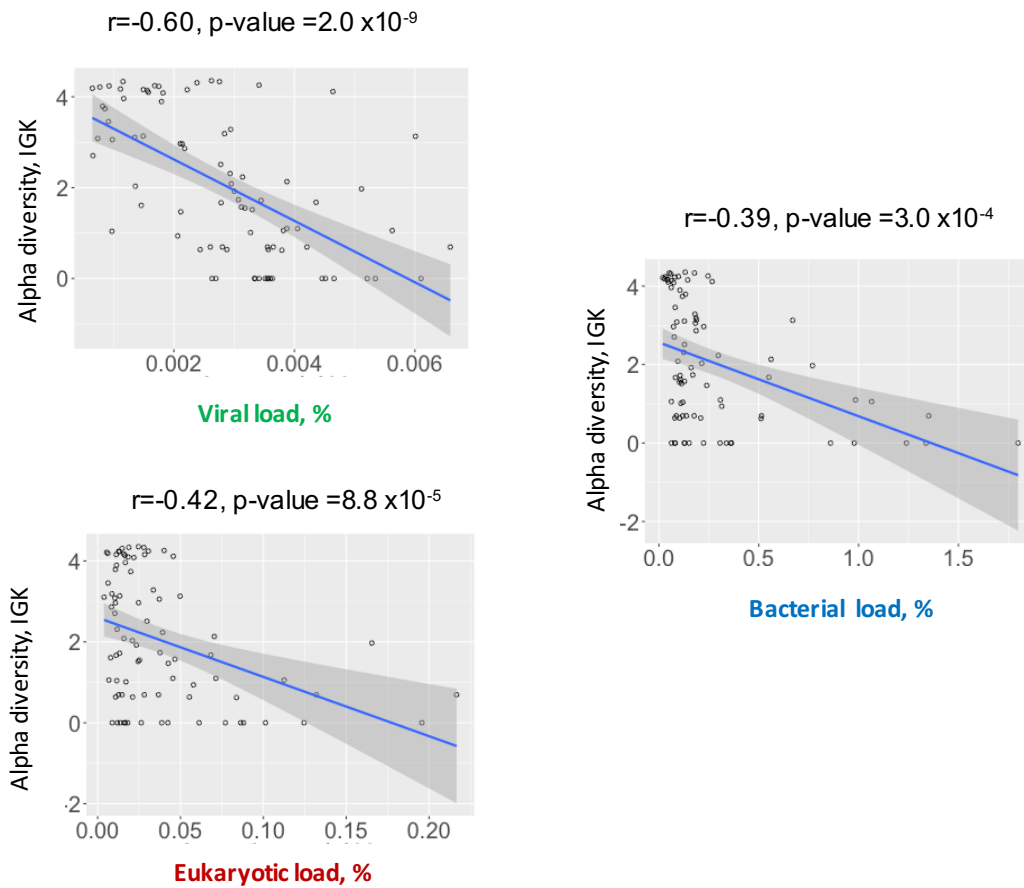

173

174 **Supplemental Figure S16. Association between microbial load and immune diversity.**

175 (a) Scatterplot of the viral load and combinatorial immune diversity of IGK locus. Pearson  
 176 correlation coefficient (r) and p -value are reported. (b) Scatterplot of the eukaryotic load  
 177 and combinatorial immune diversity of IGK locus. Pearson correlation coefficient (r) and  
 178 p -value are reported. (c) Scatterplot of the bacterial load and combinatorial immune  
 179 diversity of IGK locus. Pearson correlation coefficient (r) and p -value are reported.

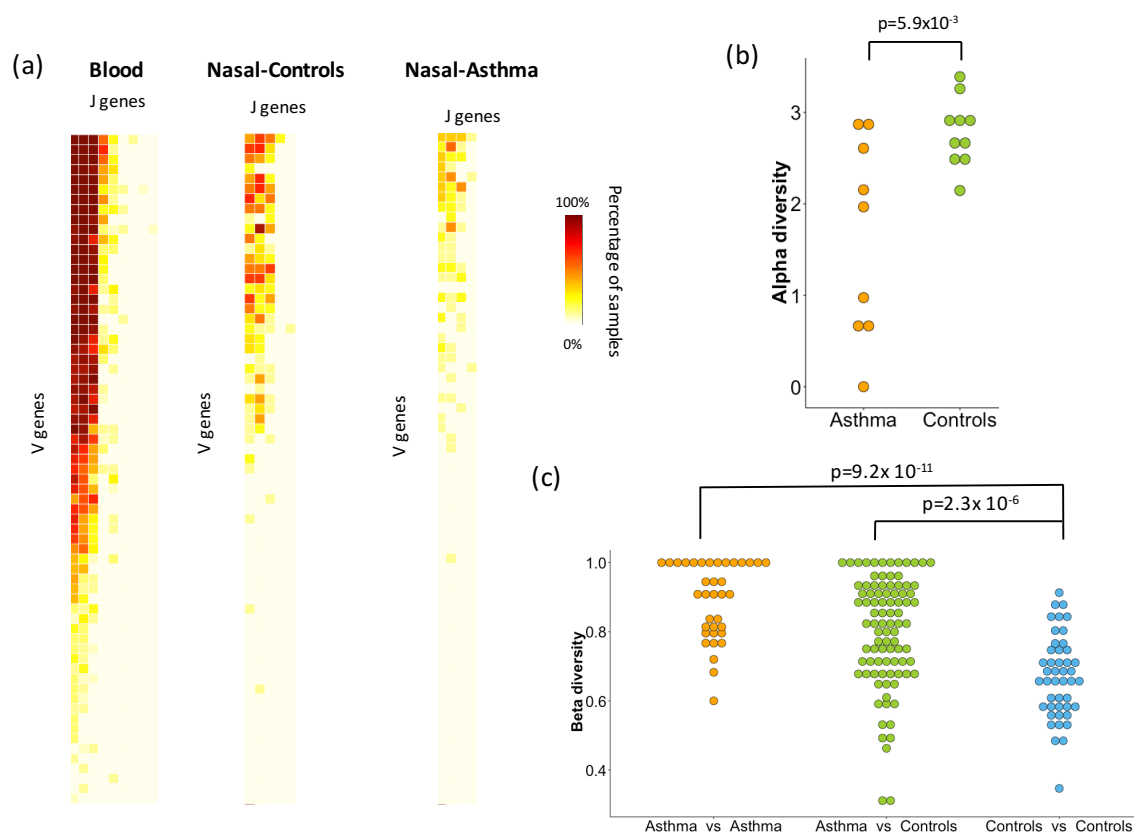

**Supplemental Figure S17. Combinatorial diversity of immunoglobulin lambda locus (IGL) locus differentiates disease status.**

(a) Heat map depicting the percentage of RNA-Seq samples supporting particular VJ combination for whole blood, nasal epithelium of healthy controls and asthmatic individuals. Each row corresponds to a V gene and each column corresponds to a J gene. (b) Alpha diversity is measured using the Shannon entropy incorporating the total number of VJ combinations and their relative proportions. Nasal epithelium of asthmatic individuals exhibits decreased combinatorial diversity of IGL locus compared to that of healthy controls ( $p$ -value= $5.9 \times 10^{-3}$ ). (c) Compositional similarities between the samples in terms of gain or loss of VJ combinations of IGL locus are measured using the Sørensen–

Dice index across pairs of samples from the same group (Asthma, Controls) and pairs of sample from different groups (Asthma versus Controls). Lower level of similarity is observed between nasal samples of the asthmatic individuals compared to the unaffected controls ( $p\text{-value} < 9.2 \times 10^{-11}$ ). Nasal samples of the unaffected controls are more similar to each other than to the asthmatic individuals ( $p\text{-value} < 2.3 \times 10^{-6}$ ).

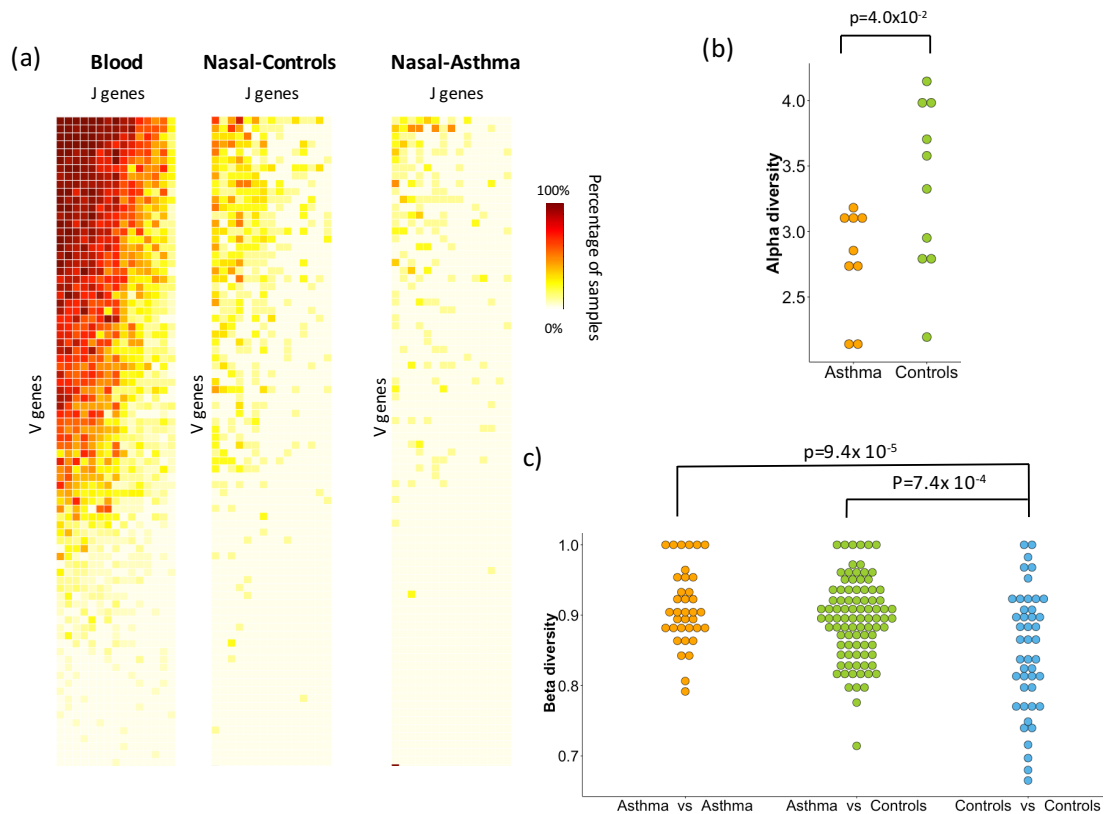

**Supplemental Figure S18. Combinatorial diversity of T cell receptor beta (TCRB) locus differentiates disease status.**

(a) Heat map depicting the percentage of RNA-Seq samples supporting of particular VJ combination for whole blood, nasal epithelium of healthy controls and of asthmatic individuals. Each row corresponds to a V gene and each column corresponds to a J gene.

(b) Alpha diversity is measured using the Shannon entropy incorporating the total number of VJ combinations and their relative proportions. The nasal epithelium of asthmatic individuals exhibits a decrease in combinatorial diversity of IGK locus compared to that of healthy controls (p-value =  $4.0 \times 10^{-2}$ ). (c) Compositional similarities between the samples in terms of gain or loss of VJ combinations of IGK locus are measured using the Sørensen–Dice index across pairs of sample from the same group (Asthma, Controls) and pairs of sample from different groups (Asthma versus Controls). Lower level of similarity is observed between nasal samples of asthmatic individuals compared to unaffected controls (p-value <  $9.4 \times 10^{-5}$ ). Nasal samples of unaffected controls are more similar to each other than to the asthmatic individuals (p-value <  $7.4 \times 10^{-4}$ ).



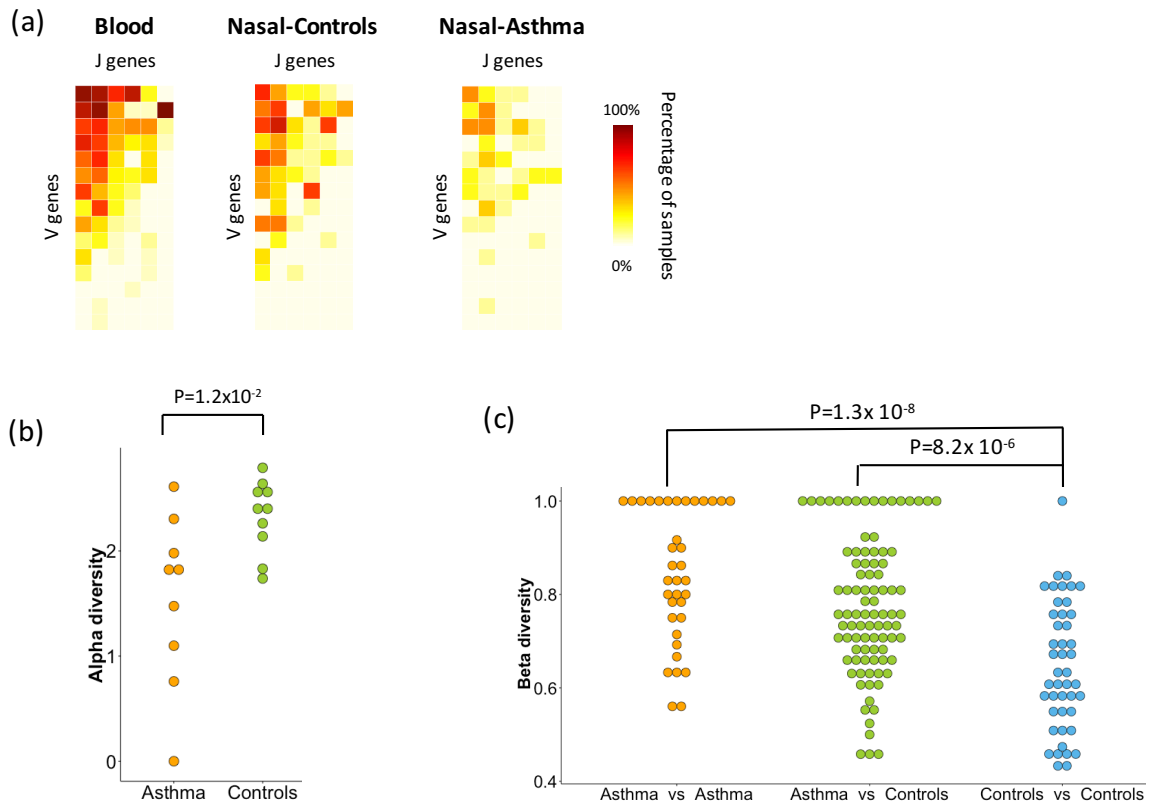

**Supplemental Figure S19. Combinatorial diversity of T cell receptor gamma (TCRG) locus differentiates disease status.**

(a) Heat map depicting the percentage of RNA-Seq samples supporting of a particular VJ combination for whole blood, nasal epithelium of healthy controls and asthmatic individuals. Each row corresponds to a V gene and each column corresponds to a J gene.

(b) Alpha diversity is measured using the Shannon entropy incorporating the total number of VJ combinations and their relative proportions. Nasal epithelium of asthmatic individuals exhibits decreased combinatorial diversity of IGK locus compared to that of healthy controls ( $p$ -value =  $1.2 \times 10^{-2}$ , ANOVA).

(c) Compositional similarities between the samples in terms of gain or loss of VJ combinations of IGK locus are measured using the

Sørensen–Dice index across pairs of sample from the same group (Asthma, Controls) and pairs of sample from different groups (Asthma versus Controls). Lower level of similarity is observed between nasal samples of asthmatic individuals compared to unaffected controls (p-value <  $1.3 \times 10^{-8}$ ). Nasal samples of unaffected controls are more similar to each other than to the asthmatic individuals (p-value <  $8.2 \times 10^{-6}$ ).

(a) Number of reads categorized by RNA-Seq aligners

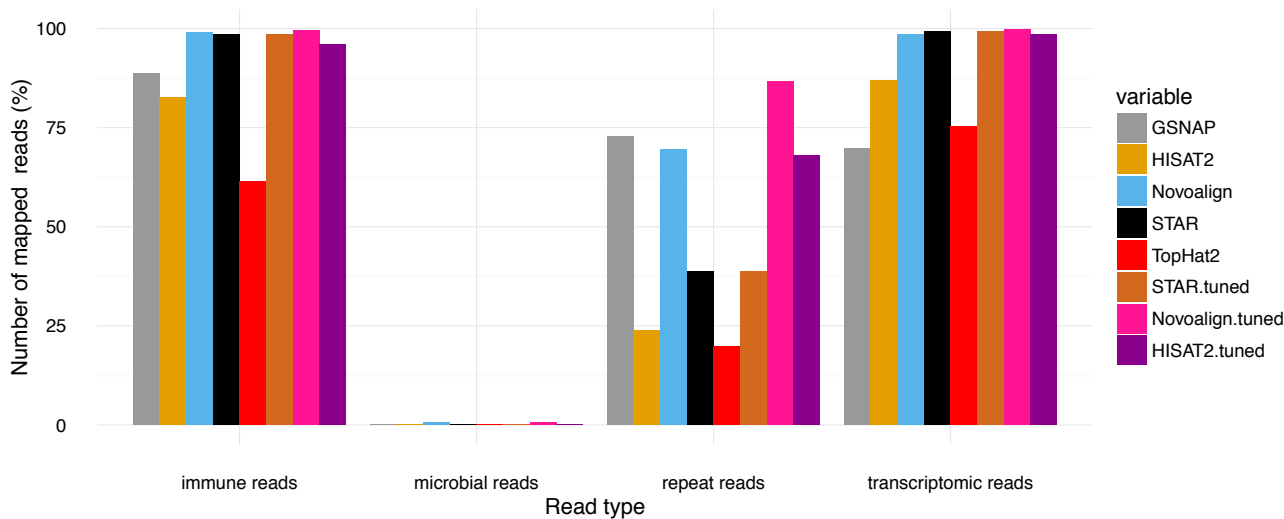

(b) Number of reads categorized by ROP using different RNA-Seq aligners

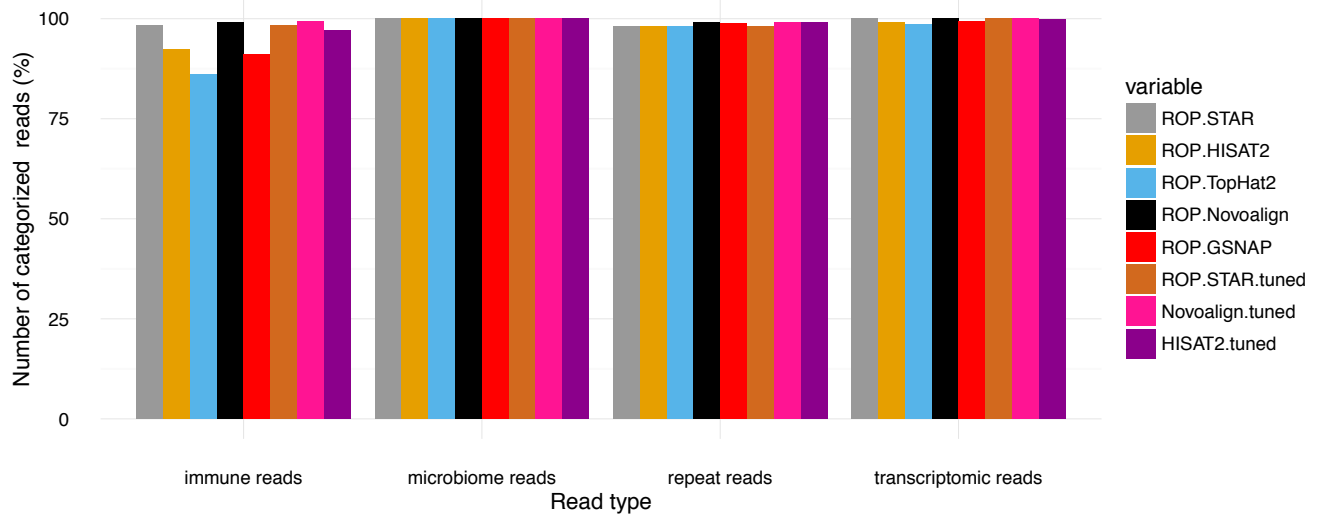

**Supplemental Figure S20.** The effect of RNA-Seq aligner on the fraction of reads accounted by ROP. Percentages are calculated from the total number of reads in each category. RNA-Seq aligners were run with default and optimized (tuned) parameters. We use tuned setting recommended by Baruzzo et al. (2017). TopHat2 and GSNAP were only run with default settings. Results are presented for simulated RNA-Seq data composed of transcriptomic, repeat, immune, and microbial reads. (a) Percentages of reads accounted by RNA-Seq aligners. (b) Percentages of reads categorized by ROP across five state of the art aligners.

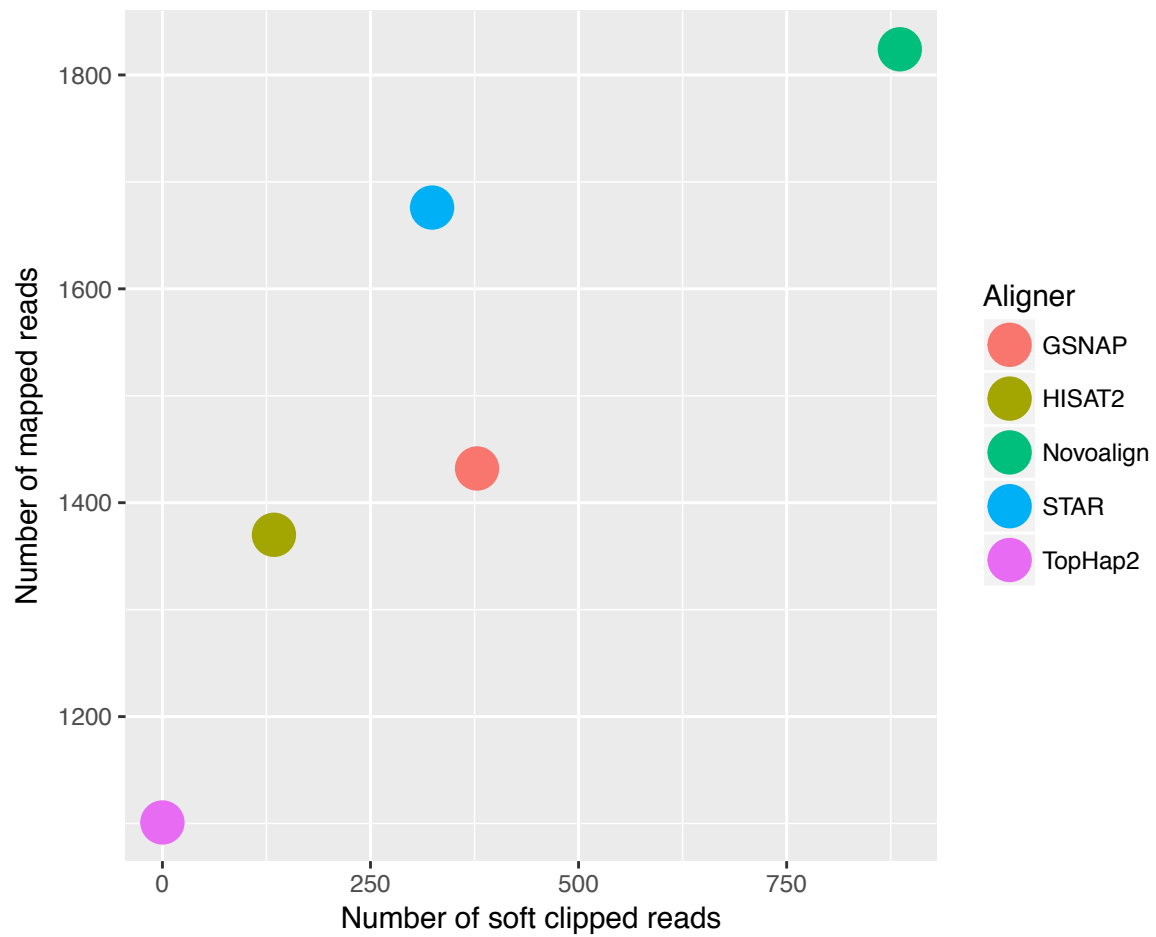

**Supplemental Figure S21.** Relationship between the number of soft clipped RNA-Seq reads (partially mapped reads) and the total number of reads. Results are presented for simulated RNA-Seq data composed of transcriptomic, repeat, immune, and microbial reads.

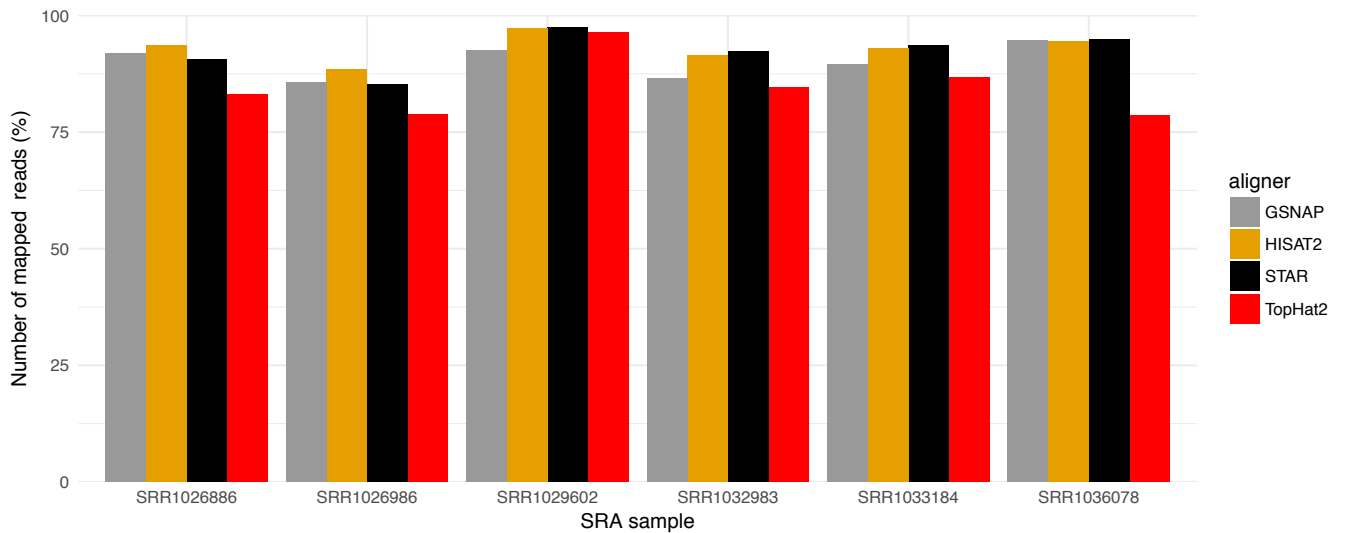

**Supplemental Figure S22.** Number of the RNA-Seq reads mapped to the human reference genome across five state-of-the-art RNA-Seq aligners. Number of mapped reads is separately reported for each SRA sample. Percentages are calculated from the total number of reads. Results are presented for 10 randomly selected SRA RNA-Seq samples. Tools were run with default parameters. Novoalign was excluded from this analysis because none of the experiments finished running within 24 hours.
